# Supplementary material for: Grafting of oxo-vanadium Schiff base on graphene nanosheets and its catalytic activity for the oxidation of alcohols
Source: Royal Society of Chemistry journal article supplement (doi:10.1039/c2jm15644j), 2012-01-01

## Supporting Information

for

# **Grafting of Oxo-vanadium Schiff Base on Graphene Nanosheets and its Catalytic Activity for the Oxidation of Alcohols**

Harshal P. Mungse, Sanny Verma, Neeraj Kumar, Bir Sain, Om P. Khatri\*

**Figure S1: TGA / DTA characterization**

**Figure S2: FTIR characterization**

**Figure S1** TGA and DTA patterns for (a) the graphene oxide, (b) the APTES coated graphene nanosheets, and (b) the graphene immobilized oxo-vanadium Schiff base catalyst

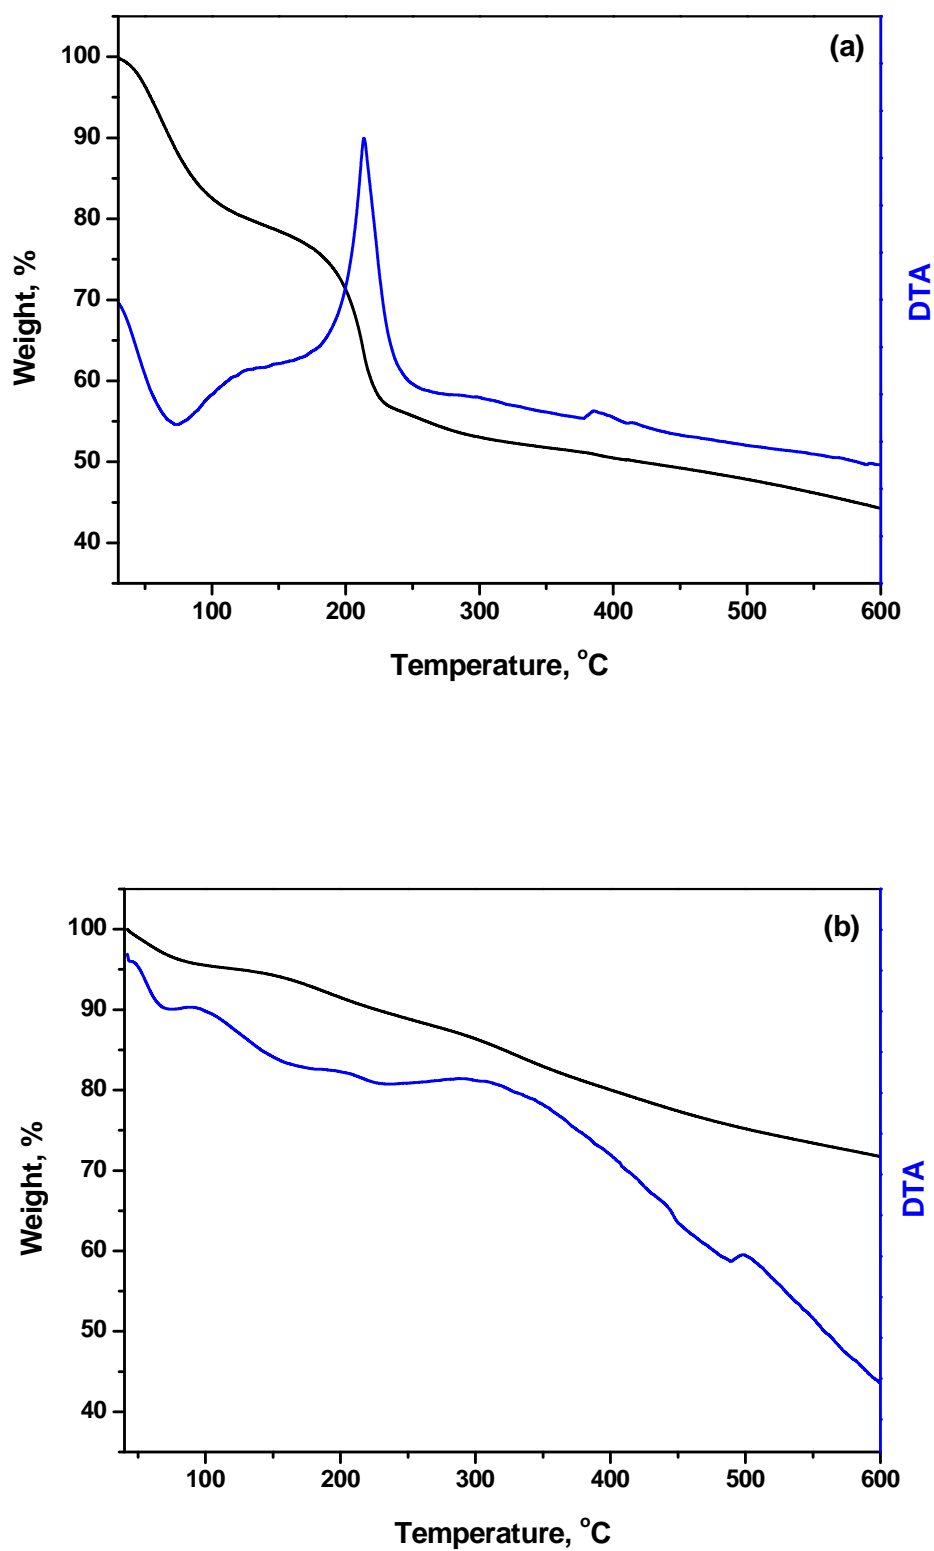

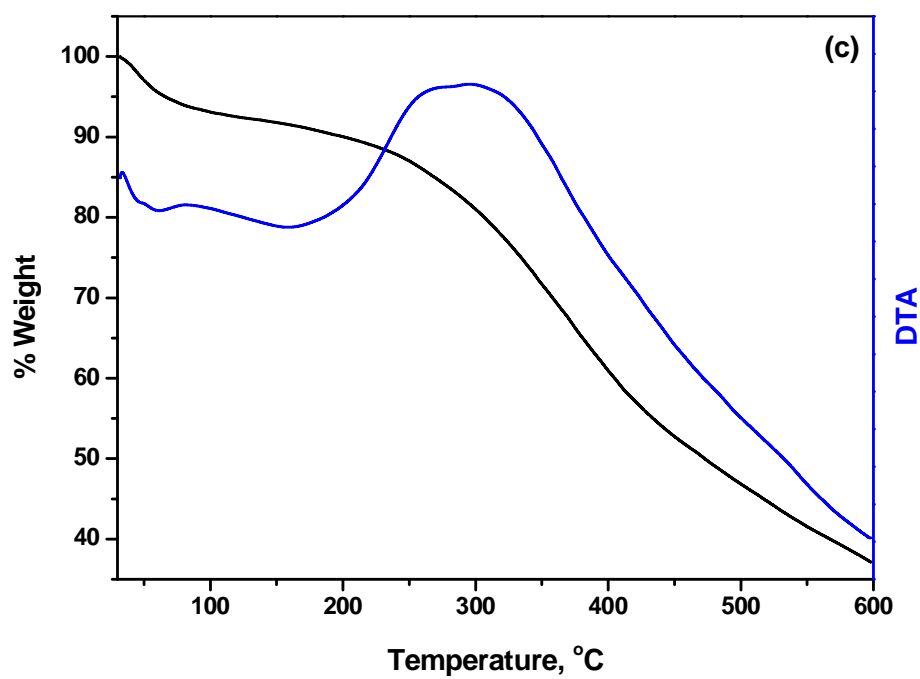

**Figure S2** FTIR spectra of (a) the graphene oxide, (b) the APTES coated graphene oxide, and (c) the graphene immobilized oxo-vanadium Schiff base catalyst.

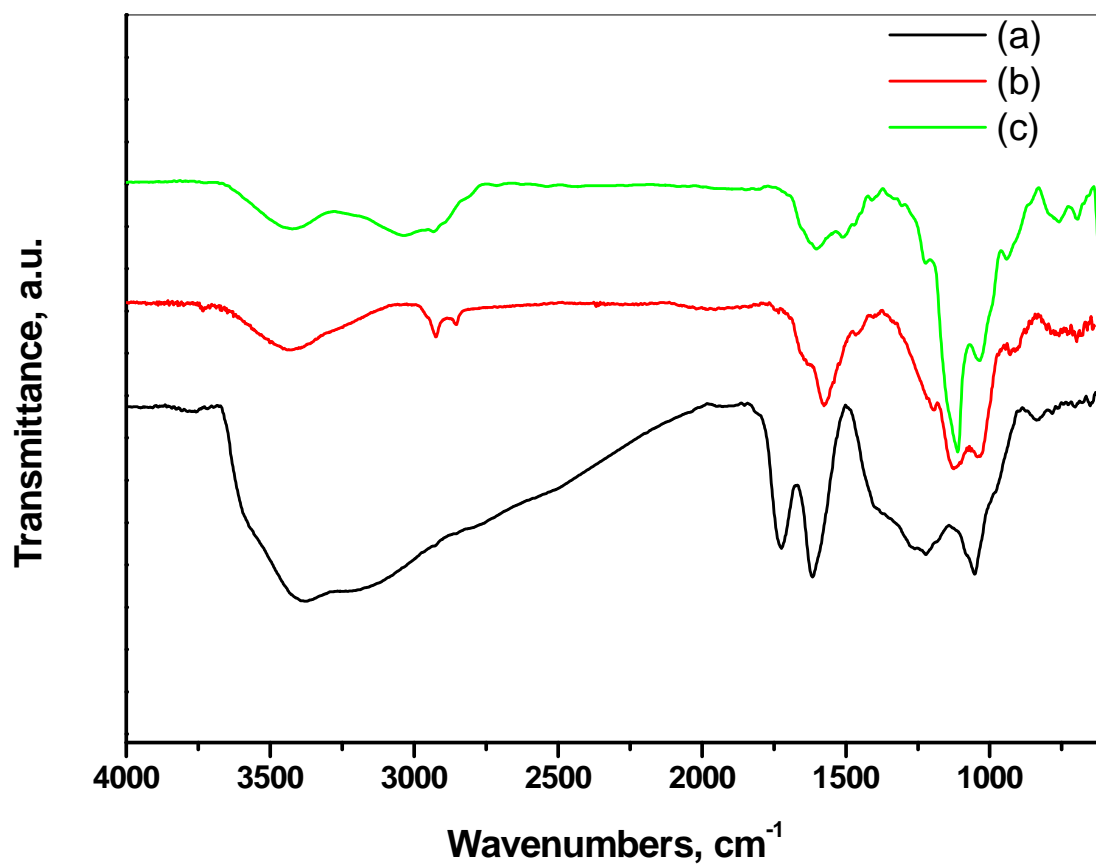

Supplement: c2jm15644j.pdf [file c2jm15644j.pdf]
